# Supplementary material for: A recurrent de novo missense mutation in UBTF causes developmental neuroregression
Source: PubMed Central journal article supplement — Hum Mol Genet. 2018 Jan 2;27(4):691–705. doi: 10.1093/hmg/ddx435 (PMC5886272; doi:10.1093/hmg/ddx435), 2018-01-02
Supplement: supplementary_material_ddx435.pdf [file supplementary_material_ddx435.pdf]

**Table S1. Exome data quality**

| Pedigree/<br>Subject     | Exons $\geq 10X$<br>Average |        | Exons $\geq 20X$<br>Average |        | Exons $\geq 50X$<br>Average |        | Mapped<br>Reads | Reads in<br>Exons | % of<br>Mapped | # variant<br>calls per<br>subject | # variants<br>used in<br>analysis |
|--------------------------|-----------------------------|--------|-----------------------------|--------|-----------------------------|--------|-----------------|-------------------|----------------|-----------------------------------|-----------------------------------|
|                          | Count                       | %      | Count                       | %      | Count                       | %      |                 |                   |                |                                   |                                   |
| *0328/0328<br>(Proband)  | 226,303                     | 98.49% | 219,103                     | 95.36% | 178,648                     | 77.75% | 50,336,430      | 33,160,266        | 65.88          | 590,189                           | 931,996                           |
| 0328/0326<br>(Mother)    | 226,520                     | 98.58% | 220,653                     | 96.03% | 185,044                     | 80.53% | 48,457,440      | 31,400,649        | 64.80          | 616,927                           |                                   |
| 0328/0327<br>(Father)    | 226,414                     | 98.54% | 219,506                     | 95.53% | 180,332                     | 78.48% | 46,921,607      | 30,630,060        | 65.28          | 604,568                           |                                   |
| **2009/2009<br>(Proband) | 188,990                     | 84.81% | 184,199                     | 82.66% | 153,447                     | 68.86% | 91,039,553      | 65,083,250        | 71.49          | 132,292                           | 115,730                           |
| 2009/2433<br>(Father)    | 189,279                     | 84.94% | 185,201                     | 83.11% | 164,388                     | 73.77% | 98,752,261      | 72,658,338        | 73.58          | 131,498                           |                                   |
| 2009/2434<br>(Mother)    | 189,145                     | 84.88% | 185,023                     | 83.03% | 160,801                     | 72.16% | 92,414,068      | 67,844,788        | 73.41          | 130,738                           |                                   |
| 2009/2625<br>(Sister)    | 187,117                     | 83.97% | 180,544                     | 81.02% | 117,414                     | 52.69% | 67,682,913      | 48,741,385        | 72.01          | 130,897                           |                                   |
| 2009/2626<br>(Brother)   | 187,653                     | 84.12% | 180,878                     | 81.17% | 122,405                     | 54.93% | 70,854,543      | 50,829,897        | 71.74          | 130,921                           |                                   |
| **7621/7261<br>(Proband) | 193,558                     | 86.86  | 182,794                     | 82.03  | 96,288                      | 43.21% | 61,040,317      | 45,873,872        | 75.15          | 119,589                           | 125,437                           |
| 7621/8268<br>(Father)    | 194,872                     | 87.45  | 187,830                     | 84.29  | 125,948                     | 56.52% | 74,156,062      | 55,932,680        | 75.43          | 121,123                           |                                   |
| 7621/8267<br>(Mother)    | 193,290                     | 86.74  | 182,549                     | 81.92  | 99,096                      | 44.47% | 59,571,527      | 45,802,482        | 76.89          | 117,276                           |                                   |
| 7621/8198<br>(Sister)    | 194,337                     | 87.21  | 187,875                     | 84.31  | 125,970                     | 56.53% | 71,326,004      | 55,219,896        | 77.42          | 120,182                           |                                   |
| **5762/5762<br>(Proband) | 190,081                     | 85.30% | 179,853                     | 80.71% | 113,023                     | 50.72% | 65,707,714      | 44,398,392        | 67.63          | 321,003                           | 341,206                           |
| 5762/6766<br>(Father)    | 190,638                     | 85.55% | 180,900                     | 81.18% | 119,619                     | 53.68% | 70,459,783      | 47,246,019        | 67.05          | 331,958                           |                                   |
| 5762/6765<br>(Mother)    | 190,549                     | 85.51% | 181,858                     | 81.61% | 127,931                     | 57.41% | 80,231,612      | 52,189,040        | 65.05          | 359,359                           |                                   |
| 5762/6767<br>(Brother)   | 189,970                     | 85.25% | 178,360                     | 80.04% | 110,349                     | 49.52% | 67,773,116      | 44,932,428        | 66.30          | 331,808                           |                                   |

\* Exon coverage was calculated with the BEDtools coverage tool v2.25.0 (Quinlan and Hall, 2010) using the bed file associated with the exome capture kit. Only reads in which greater than 50% of the base pairs overlapping each feature (exon) were counted. Each feature that contained at least 10X-, 20X-, or 50X-coverage was counted and divided by the sum of the total features. Mapped reads were calculated with SAMtools view v1.3.1 (Li et al., 2009) by filtering out reads with the unmapped flag set.

\*\* UCSC build hg19 was used to define genomic (intronic and exonic) and exonic regions for all known genes. The total exon range was calculated for each transcript and the transcript with the highest total exon range was considered the largest transcript. The total exon range represents the sum of the exon lengths for a transcript. In cases where a gene had multiple equal length largest transcripts, only one was used for statistical processing. Ultimately, 27,145 transcripts and 222,839 exons were utilized. These transcripts were defined using 0-based coordinates. Sambamba 0.6.6 (Tarasov et al., 2015) in conjunction with a shell script was used to procure the mean coverage and total mapped reads for each genomic and exonic region. A read was counted for mean coverage and for calculating the total mapped reads, if it passed a mapping quality threshold of  $\geq 0$ . Duplicate reads and reads that failed quality control were not included. Regions were differentiated into 5 categories: no coverage, mean coverage  $0 < X < 10$ , mean coverage  $10 \leq X < 20$ , mean coverage  $20 \leq X < 50$ , and mean coverage  $\geq 50$ . The percentage for each category was calculated by dividing the number of exons that fell into a specific category over the total number of exons present in the generated largest transcript reference BED file. Total mapped reads for each patient were generated by summing the read counts in the genomic regions. Percentage of mapped reads was calculated by dividing the reads in exons by the total mapped reads.

**Table S2. Variants considered**

| Proband | Gene     | Genomic Coordinates                                               | Variant                                                                                                                             | CADD                 | ExAC Frequency                                               | ExAC pLI | Inheritance Model     | Variant Description              |
|---------|----------|-------------------------------------------------------------------|-------------------------------------------------------------------------------------------------------------------------------------|----------------------|--------------------------------------------------------------|----------|-----------------------|----------------------------------|
| 328     | UBTF     | chr17:g.42290219C>T                                               | NM_014233.2(UBTF):<br>c.628G>A(p.Glu210Lys)                                                                                         | 32                   | NA                                                           | 1.00     | de novo               | missense                         |
| 328     | COL6A5   | chr3:g.130107975A>G<br>chr3:g.130095164C>T<br>chr3:g.130095493G>A | NM_153264.5(COL6A5):c.2414A>G(p.His805Arg)<br>NM_153264.5(COL6A5):c.152C>T(p.Thr51Met)<br>NM_153264.5(COL6A5):c.481G>A(p.Gly161Arg) | 8.641<br>8.254<br>23 | 1.80E-2(137/7638)<br>1.67E-5(2/119816)<br>2.08E-4(22/105643) | 0.00     | compound heterozygous | missense<br>missense<br>missense |
| 328     | MUC17    | chr7:g.100680261C>T<br>chr7:g.100683221A>G                        | NM_001040105.1(MUC17):<br>c.5564C>T(p.Thr1855Ile)<br>NM_001040105.1(MUC17):<br>c.8524A>G(p.Thr2842Ala)                              | 12.39<br>0.061       | NA<br>2.19E-3(266/121348)                                    | NA       | compound heterozygous | missense<br>missense             |
| 328     | MUC5B    | chr11:g.1253994G>A<br>chr11:g.1251805C>T                          | NM_002458.1(MUC5B):c.2068G>A(p.Val690Ile)<br>NM_002458.1(MUC5B):c.1454C>T(p.Thr485Met)                                              | 16.59<br>15.04       | 3.18E-5(3/94252)<br>8.85E-5(9/101730)                        | 1.00     | compound heterozygous | missense<br>missense             |
| 328     | TMEM131  | chr2:g.98375414G>A<br>chr2:g.98377264T>C                          | NM_015348.1(TMEM131):<br>c.5309C>T(p.Ala1770Val)<br>NM_015348.1(TMEM131):<br>c.5003A>G(p.Lys1668Arg)                                | 15.59<br>21.5        | 5.87E-5(7/119260)<br>NA                                      | 1.00     | compound heterozygous | missense<br>missense             |
| 328     | UBASH3A  | chr21:g.43824076C>A<br>chr21:g.43854987G>C                        | NM_018961.2(UBASH3A):c.22C>A(p.Leu8Ile)<br>NM_018961.2(UBASH3A):<br>c.1316G>C(p.Arg439Thr)                                          | 23.1<br>1.38         | 1.79E-4(3/16768)<br>2.47E-5(3/121356)                        | 0.00     | compound heterozygous | missense<br>missense             |
| 328     | SSX5     | chrX:g.48054229T>C                                                | NM_021015.3(SSX5):c.254A>G(p.Glu85Gly)                                                                                              | NA                   | 2.29E-5(2/87186)                                             | 0.00     | X-linked              | missense                         |
| 2009    | UBTF     | chr17:g.42290219C>T                                               | NM_014233.2(UBTF):<br>c.628G>A(p.Glu210Lys)                                                                                         | 32                   | NA                                                           | 1.00     | de novo               | missense                         |
| 2009    | KLC4     | chr6:43034797C>G<br>chr6:43039337G>A                              | NM_201523.2(KLC4):<br>c.909C>T(p.Ser303Ser)<br>NM_201523.2(KLC4):<br>c.1342G>A(p.Glu448Lys)                                         | 16.96<br>25.8        | 6.02E-4(73/121170)<br>5.97E-4(72/120606)                     | 0.24     | compound heterozygous | missense                         |
| 2009    | FBXO21   | chr12:117595754C>T                                                | NM_033624.2(FBXO21):<br>c.1462G>A(p.Val488Ile)                                                                                      | 22.4                 | 1.24E-4(15/121336)                                           | 0.99     | de novo               | missense                         |
| 7621    | UBTF     | chr17:g.42290219C>T                                               | NM_014233.2(UBTF):<br>c.628G>A(p.Glu210Lys)                                                                                         | 32                   | NA                                                           | 1.00     | de novo               | missense                         |
| 7621    | MUC4     | chr3:g.195510146G>C                                               | NM_004532.5(MUC4):c.83-4820C>G                                                                                                      | 10.53                | NA                                                           | NA       | de novo               | intronic                         |
| 7621    | MUC4     | chr3:g.195510181T>C                                               | NM_004532.5(MUC4):c.83-4855A>G                                                                                                      | 4.216                | 8.15E-4(17/20862)                                            | NA       | de novo               | intronic                         |
| 7621    | MUC4     | chr3:g.195510182G>A                                               | NM_004532.5(MUC4):c.83-4856G>A                                                                                                      | NA                   | 1.86E-3(38/20456)                                            | NA       | de novo               | intronic                         |
| 7621    | DBF4     | chr7:g.87530095G>A                                                | NM_006716.3(DBF4):c.826G>A(p.Asp276Asn)                                                                                             | 18.02                | 1.65E-5(2/121212)                                            | 1.00     | de novo               | missense                         |
| 7621    | KRT85    | chr12:g.52757964G>A                                               | NM_002283.3(KRT85):c.691-17C>T                                                                                                      | 3.067                | NA                                                           | 0.00     | de novo               | intronic                         |
| 7621    | DNAH9    | chr17:g.11696996A>G                                               | NM_001372.3(DNAH9):c.8223+15A>G                                                                                                     | 1.89                 | 7.09E-4(85/119934)                                           | 0.00     | de novo               | intronic                         |
| 7621    | HMCN1    | chr1:g.185878454C>T<br>chr1:g.186105795C>T                        | NM_031935.2(HMCN1):c.622-15C>T<br>NM_031935.2(HMCN1):c.13313-5C>T                                                                   | 5.71<br>7.612        | NA<br>2.73E-3(331/121066)                                    | 0.00     | compound heterozygous | intronic<br>intronic             |
| 7621    | CACNA2D3 | chr3:g.54925426C>T<br>chr3:g.54925493C>A                          | NM_018398.2(CACNA2D3):<br>c.2195C>T(p.Thr732Met)<br>NM_018398.2(CACNA2D3):c.2246+16C>A                                              | 34<br>10.28          | 7.62E-3(919/120586)<br>8.93E-3(1071/119836)                  | 1.00     | compound heterozygous | Missense<br>intronic             |
| 7621    | POMT1    | chr9:g.134394788G>A<br>chr9:g.134397464C>T                        | NM_007171.3(POMT1):c.1565G>A(p.Arg522Lys)<br>NM_007171.3(POMT1):c.1922C>T(p.Ala641Val)                                              | 1.671<br>11.42       | 1.25E-3(26/20754)<br>7.58E-3(919/121230)                     | 0.00     | compound heterozygous | Missense<br>missense             |
| 7621    | TAOK3    | chr12:g.118610323C>T<br>chr12:g.118704579G>A                      | NM_001346487.1(TAOK3):<br>c.1865G>A(p.Arg622His)<br>NM_001346487.1(TAOK3):c.-193-15C>T                                              | 35<br>0.867          | 8.24E-5(10/121412)<br>NA                                     | 1.00     | compound heterozygous | Missense<br>intronic             |
| 7621    | DNAH3    | chr16:g.21093012C>T<br>chr16:g.21139071G>A                        | NM_017539.2(DNAH3):c.2914G>A(p.Glu972Lys)<br>NM_017539.2(DNAH3):c.1145C>T(p.Pro382Leu)                                              | 23.5<br>20.3         | 1.65E-3(200/121388)<br>9.72E-3(1180/121406)                  | 0.00     | compound heterozygous | missense<br>missense             |
| 7621    | MAST3    | chr19:g.18246622G>A<br>chr19:g.18255981G>A                        | NM_015016.1(MAST3):c.1856G>A(p.Arg619Gln)<br>NM_015016.1(MAST3):c.2894G>A(p.Arg965Gln)                                              | 22.2<br>26.2         | NA<br>NA                                                     | 1.00     | compound heterozygous | missense<br>missense             |
| 7621    | DHX35    | chr20:g.37634873C>T<br>chr20:g.37659385C>T                        | NM_021931.3(DHX35):c.1096C>T(p.Arg366*)<br>NM_021931.3(DHX35):c.1922C>T(p.Ala641Val)                                                | 42<br>25.1           | 5.77E-5(7/121412)<br>5.99E-3(727/121402)                     | 0.00     | compound heterozygous | nonsense<br>missense             |
| 7621    | C4orf47  | chr4:g.186353135G>T<br>chr4:g.186370727G>A                        | NM_001114357.1(C4orf47):c.101-1G>T<br>NM_001114357.1(C4orf47):c.882-23G>A                                                           | 24.7<br>10.06        | 1.45E-3(31/21364)<br>4.80E-2(932/19410)                      | NA       | compound heterozygous | Splice-site<br>intronic          |
| 7621    | C9orf43  | chr9:g.116181419A>G<br>chr9:g.116187302C>G                        | NM_001278629.1(C9orf43):c.319A>G(p.Ile107Val)<br>NM_001278629.1(C9orf43):<br>c.811C>G(p.Pro271Ala)                                  | 13.33<br>22.6        | 1.82E-2(2205/121024)<br>5.39E-2(6485/120402)                 | 0.00     | compound heterozygous | missense<br>missense             |
| 5762    | UBTF     | chr17:g.42290219C>T                                               | NM_014233.2(UBTF):<br>c.628G>A(p.Glu210Lys)                                                                                         | 32                   | NA                                                           | 1.00     | de novo               | missense                         |
| 5762    | PIBF1    | chr13:g.73401237G>A<br>chr13:g.73547733TTA<br>AA>T                | NM_001349655.1(PIBF1):c.896G>A(p.Arg299Gln)<br>NM_001349655.1(PIBF1):<br>c.1974-1977delITAA(p.Asn658Lysfs*15)                       | 25.7<br>35           | 1.07E-2(1264/118622)<br>1.09E-4(13/119262)                   | 0.00     | compound heterozygous | missense<br>outframe<br>deletion |
| 5762    | HNCN4    | chr15:g.73615084G>A<br>chr15:g.73617804G>T                        | NM_005477.2(HNCN4):c.3350C>T(p.Pro1117Leu)<br>NM_005477.2(HNCN4):c.1591-19C>A                                                       | 22.9<br>1.243        | 3.16E-3(63/19948)<br>6.77E-3(820/121172)                     | 0.23     | compound heterozygous | missense<br>intronic             |
| 5762    | NLRP6    | chr11:g.284242C>G                                                 | NM_138329.2(NLRP6):c.2214C>G(p.Cys738Trp)                                                                                           | 22.9                 | NA                                                           | NA       | de novo               | missense                         |
| 5762    | CTSF     | chr11:g.66333485G>C                                               | NM_003793.3(CTSF):c.867+8C>G                                                                                                        | 4.596                | 8.24E-6(1/121338)                                            | 0.00     | de novo               | intronic                         |

**Table S3.** Autistic behaviors of TGen\_0328 at 4.6 years of age

|                                                    |
|----------------------------------------------------|
| Difficulty following directions at home and school |
| Difficulty paying attention at school              |
| Easily distractible                                |
| Difficulty completing tasks                        |
| Restless and fidgety                               |
| Difficulty sitting still                           |
| Difficulty following rules                         |
| Frequent crying                                    |
| Lacked understanding of social cues                |
| Temper tantrums                                    |
| Lack of interest in other children                 |
| Did not enjoy interacting with peers               |
| Did not share toys and play space                  |
| Did not take turns at play                         |
| Did not pretend play                               |
| Did not tolerate changes in routine                |
| Bothered by particular sounds                      |

**Table S4.** Gene expression in fibroblasts

| Tissue                  | <i>UBTF</i>       |              | pre-rRNA           |                           | 18S                |
|-------------------------|-------------------|--------------|--------------------|---------------------------|--------------------|
|                         | Total <i>UBTF</i> | <i>UBTF1</i> | Random primer cDNA | Gene specific primer cDNA | Random primer cDNA |
| <b>Controls (N = 4)</b> | 1.00 ± 0.04       | 1.00 ± 0.02  | 1.00 ± 0.05        | 1.00 ± 0.05               | 1.00 ± 0.03        |
| <b>Patients (N = 4)</b> | 1.08 ± 0.03       | 1.09 ± 0.04  | 3.18 ± 0.67*       | 3.95 ± 0.60*              | 2.27 ± 0.11*       |

QRT-PCR values are referenced to normal controls and presented as means ± SEM.  $\beta$ -actin was used as the endogenous control. \* $P < 0.05$ .

**Table S5.** Expression of genes regulated by UBTF2 in human fibroblasts and mouse brain

| Gene                     | Fibroblasts |              | <i>Ubtf</i> <sup>+/+</sup> Mice |             | <i>Ubtf</i> <sup>-/-</sup> Mice |             |
|--------------------------|-------------|--------------|---------------------------------|-------------|---------------------------------|-------------|
|                          | Controls    | Patients     | Cerebral cortex                 | Cerebellum  | Cerebral cortex                 | Cerebellum  |
| <i>Hyal1/HYAL1</i>       | 1.00 ± 0.03 | 1.30 ± 0.09  | 1.00 ± 0.04                     | 2.07 ± 0.09 | 1.05 ± 0.03                     | 1.98 ± 0.08 |
| <i>Ppargc1a/PPARGC1A</i> | 1.00 ± 0.04 | 2.27 ± 0.35* | 1.00 ± 0.03                     | 1.54 ± 0.06 | 1.04 ± 0.04                     | 1.47 ± 0.06 |
| <i>Fancb/FANCB</i>       | 1.00 ± 0.02 | 0.97 ± 0.07  | 1.00 ± 0.03                     | 1.21 ± 0.04 | 0.92 ± 0.04                     | 1.17 ± 0.05 |
| <i>Hist1h4b/HIST1H4B</i> | 1.00 ± 0.03 | 0.60 ± 0.05* | 1.00 ± 0.03                     | 1.26 ± 0.08 | 0.79 ± 0.02                     | 0.97 ± 0.05 |
| <i>Slc4a4/SLC4A4</i>     | 1.00 ± 0.04 | 0.69 ± 0.06* | 1.00 ± 0.05                     | 3.64 ± 0.33 | 0.95 ± 0.03                     | 3.37 ± 0.39 |

$\beta$ -actin was used as the endogenous control. QRT-PCR values are referenced to wild-type (*Ubtf*<sup>+/+</sup>) cerebral cortex or human fibroblast controls and presented as means  $\pm$  SEM (N = 4 samples/genotype). \**P* < 0.05.

**Table S6.** Fly lethality tables

|                                     | <i>c155-GAL4/c155-GAL4 X UAS-UBTF1/CyO</i>           |          |                |
|-------------------------------------|------------------------------------------------------|----------|----------------|
| Genotype                            | Observed                                             | Expected | <i>P</i> value |
| <i>c155-GAL4;CyO</i>                | 26                                                   | 23       |                |
| <i>c155-GAL4; UAS-UBTF1</i>         | 20                                                   | 23       | 0.68           |
|                                     | <i>c155-GAL4/c155-GAL4 X UAS-UBTF1-E210K/CyO</i>     |          |                |
| <i>c155-GAL4;CyO</i>                | 118                                                  | 59       |                |
| <i>c155-GAL4; UAS-UBTF1-E210K</i>   | 0                                                    | 59       | < 0.0001       |
|                                     | <i>eye3.5-GAL4/eye3.5-GAL4 X UAS-UBTF1/CyO</i>       |          |                |
| <i>eye3.5-GAL4;CyO</i>              | 38                                                   | 24       |                |
| <i>eye3.5-GAL4; UAS-UBTF</i>        | 10                                                   | 24       | 0.0052         |
|                                     | <i>eye3.5-GAL4/eye3.5-GAL4 X UAS-UBTF1 E210K/CyO</i> |          |                |
| <i>eye3.5-GAL4;CyO</i>              | 56                                                   | 28       |                |
| <i>eye3.5-GAL4; UAS-UBTF1-E210K</i> | 0                                                    | 28       | < 0.0001       |

**Table S7.** *Ubtf* expression in mice

| Tissue                 | <i>Ubtf</i> <sup>+/+</sup> |              | <i>Ubtf</i> <sup>-/-</sup> |              |
|------------------------|----------------------------|--------------|----------------------------|--------------|
|                        | Total <i>Ubtf</i>          | <i>Ubtf1</i> | Total <i>Ubtf</i>          | <i>Ubtf1</i> |
| <b>Cerebral cortex</b> | 1.00 ± 0.02                | 1.00 ± 0.02  | 0.54 ± 0.03*               | 0.93 ± 0.04  |
| <b>Cerebellum</b>      | 1.63 ± 0.12                | 1.83 ± 0.09  | 0.85 ± 0.06*               | 1.60 ± 0.15  |
| <b>Liver</b>           | 0.64 ± 0.02                | 0.61 ± 0.02  | 0.37 ± 0.03*               | 0.55 ± 0.02  |

β-actin was used as the endogenous control. QRT-PCR values are referenced to wild-type (*Ubtf*<sup>+/+</sup>) cerebral cortex and presented as means ± SEM (N = 4 mice/genotype).  
\**P* < 0.05.

**Table S8.** Effects of genotype and sex on weight and behavioral measures in 3-month old mice.

|                                            | Male                             |                                  | Female                           |                                  |
|--------------------------------------------|----------------------------------|----------------------------------|----------------------------------|----------------------------------|
|                                            | <i>Ubt<sup>f+/+</sup></i> (n=23) | <i>Ubt<sup>f-/-</sup></i> (n=20) | <i>Ubt<sup>f+/+</sup></i> (n=21) | <i>Ubt<sup>f-/-</sup></i> (n=22) |
| <b>Weight (g)</b>                          | 26.2 ± 0.5                       | 25.3 ± 0.3                       | 19.2 ± 0.3                       | 20.3 ± 0.4                       |
| <b>Grip strength (g)</b>                   | 3.50 ± 0.06                      | 3.56 ± 0.06                      | 2.98 ± 0.07                      | 3.12 ± 0.13                      |
| <b>Grip strength/weight</b>                | 0.133 ± 0.002                    | 0.140 ± 0.003                    | 0.151 ± 0.004                    | 0.146 ± 0.004                    |
| <b>Dominance tube (win &amp; tie %)</b>    | 27% & 33%                        | 40% & 33%                        | 12% & 48%                        | 40%* & 48%                       |
| <b>Cross maze score (%)</b>                | 30.6 ± 3.3                       | 30.2 ± 2.5                       | 30.5 ± 2.7                       | 27.6 ± 1.6                       |
| <b>Rope climbing (s)</b>                   | 2.79 ± 0.15                      | 3.61 ± 0.20*                     | 3.02 ± 0.17                      | 2.83 ± 0.12                      |
| <b>Rope climbing/weight</b>                | 0.107 ± 0.005                    | 0.140 ± 0.008*                   | 0.153 ± 0.009                    | 0.135 ± 0.007                    |
| <b>Open field activity</b>                 |                                  |                                  |                                  |                                  |
| <i>Distance traveled (cm)</i>              | 1179.2 ± 109.4                   | 971.5 ± 55.4                     | 1062.6 ± 77.1                    | 1354.5 ± 74.7*                   |
| <i>Ambulatory count</i>                    | 590.2 ± 67.0                     | 461.5 ± 27.7                     | 525.3 ± 41.3                     | 692.5 ± 41.8*                    |
| <i>Stereotypic Count</i>                   | 1580.0 ± 69.6                    | 1417.9 ± 65.9                    | 1391.3 ± 57.0                    | 1574.1 ± 50.7*                   |
| <i>Vertical count</i>                      | 69.0 ± 10.4                      | 41.6 ± 4.0*                      | 76.3 ± 33.9                      | 61.3 ± 14.6                      |
| <i>Jump count</i>                          | 17.9 ± 3.0                       | 10.9 ± 1.8                       | 18.6 ± 2.1                       | 14.2 ± 2.0                       |
| <i>Average velocity (cm/s)</i>             | 35.7 ± 1.7                       | 33.8 ± 1.8                       | 32.2 ± 2.1                       | 33.4 ± 1.6                       |
| <i>Ambulatory episodes</i>                 | 48.4 ± 4.2                       | 41.9 ± 2.6                       | 46.2 ± 3.6                       | 58.2 ± 3.3*                      |
| <b>DigiGait™</b>                           |                                  |                                  |                                  |                                  |
| <i>Propel (s) Forelimb</i>                 | 0.121 ± 0.002                    | 0.128 ± 0.004                    | 0.116 ± 0.003                    | 0.120 ± 0.002                    |
| <i>Propel (s) Hindlimb</i>                 | 0.177 ± 0.004                    | 0.189 ± 0.004*                   | 0.174 ± 0.003                    | 0.176 ± 0.003                    |
| <i>Stride length (cm) Forelimb</i>         | 6.69 ± 0.13                      | 6.99 ± 0.16                      | 6.50 ± 0.10                      | 6.72 ± 0.10                      |
| <i>Stride length (cm) Hindlimb</i>         | 6.67 ± 0.12                      | 7.05 ± 0.15*                     | 6.50 ± 0.11                      | 6.75 ± 0.10*                     |
| <i>Stride Frequency (steps/s) Forelimb</i> | 3.05 ± 0.07                      | 2.89 ± 0.08                      | 3.12 ± 0.05                      | 3.03 ± 0.05                      |
| <i>Stride Frequency (steps/s) Hindlimb</i> | 3.06 ± 0.06                      | 2.88 ± 0.07*                     | 3.12 ± 0.05                      | 3.03 ± 0.05                      |
| <i>Stance width (cm) Forelimb</i>          | 1.66 ± 0.03                      | 1.52 ± 0.02*                     | 1.59 ± 0.03                      | 1.57 ± 0.03                      |
| <i>Stance width (cm) Hindlimb</i>          | 2.84 ± 0.05                      | 2.67 ± 0.04*                     | 2.57 ± 0.04                      | 2.65 ± 0.05                      |
| <i>Step angle (deg) Forelimb</i>           | 69.17 ± 0.75                     | 70.25 ± 0.77                     | 67.29 ± 0.97                     | 68.62 ± 0.75                     |
| <i>Step angle (deg) Hindlimb</i>           | 54.87 ± 1.68                     | 56.25 ± 0.86                     | 56.03 ± 1.97                     | 56.09 ± 1.51                     |
| <i>Paw Area (cm<sup>2</sup>) Forelimb</i>  | 0.30 ± 0.01                      | 0.31 ± 0.01                      | 0.31 ± 0.01                      | 0.31 ± 0.01                      |
| <i>Paw Area (cm<sup>2</sup>) Hindlimb</i>  | 0.60 ± 0.01                      | 0.55 ± 0.01*                     | 0.58 ± 0.01                      | 0.52 ± 0.01*                     |

Ambulatory count, the total number of X + Y photo beam breaks while in ambulatory movement status. Stereotypic count, any partial-body movements that occur within the ambulatory box such as grooming, head-weaving or scratching. Vertical count, number of periods of continuous Z photo beam breaks. Jump count, the number of times that the mouse leaves the photo beam array for a period of time. Ambulatory episodes, the number of times the mouse has started moving after the resting delay has expired. Values are means ± SEM except for dominance tube. \**P* < 0.05, for effect of genotype within sex.

**Table S9.** Primers for genotyping, QRT-PCR, and Sanger sequencing

| Primer               | Sequence (5'→3')         | Locus                       | Usage                          | Product (bp)                                                |
|----------------------|--------------------------|-----------------------------|--------------------------------|-------------------------------------------------------------|
| <b>Ubtf_KO_A</b>     | tgatccctcccttctgatg      | NC_000077.6 102315400 - 381 | <i>Ubtf</i> ko mice genotyping | 429 (WT mice with Ubtf_KO_A+B+C)                            |
| <b>Ubtf_KO_B</b>     | tggggataggccttagagaga    | NC_000077.6 102313816 - 796 | <i>Ubtf</i> ko mice genotyping | 628 (Floxed mice with Ubtf_KO_A+B+C)                        |
| <b>Ubtf_KO_C</b>     | cacgggaaaacaaggtcact     | NC_000077.6 102313388 - 407 | <i>Ubtf</i> ko mice genotyping | 529 (KO mice with Ubtf_KO_A+B+C)                            |
| <b>Ubtf_q85F</b>     | gaacggagaagcgggactg      | NM_011551.6 319 - 336       | QRT-PCR                        |                                                             |
| <b>Ubtf_q85R</b>     | tccagcagatgcagcatatctt   | NM_011551.6 411 - 390       | QRT-PCR                        | 93 for both <i>Ubtf1</i> and <i>Ubtf2</i> (with Ubtf_q85F)  |
| <b>Ubtf_q9F</b>      | agcgaagaggtacgagga       | NM_011551.6 1071 - 1089     | QRT-PCR                        |                                                             |
| <b>Ubtf_q9R</b>      | tcgaactgtccttgagctg      | NM_011551.6 1197 - 1178     | QRT-PCR                        | 127 for <i>Ubtf1</i> (with Ubtf_q9F)                        |
| <b>Slc4a4_p26F</b>   | actgtctccagtgcaagtagga   | NM_018760.2 754 - 775       | QRT-PCR                        |                                                             |
| <b>Slc4a4_p26R</b>   | gtcagattcctgtgggtca      | NM_018760.2 828 - 809       | QRT-PCR                        | 75 (with Slc4a4_p26R)                                       |
| <b>Fancb_p21F</b>    | tgccaagtgatgaaatggta     | NM_175027.4 1595 - 1615     | QRT-PCR                        |                                                             |
| <b>Fancb_p21R</b>    | ggcaccatgtctgctctaca     | NM_175027.4 1738 - 1719     | QRT-PCR                        | 144 (with Fancb_p21F)                                       |
| <b>Hist1h4b_p81F</b> | cgtcacctacacggagcac      | NM_178193.2 294 - 312       | QRT-PCR                        |                                                             |
| <b>Hist1h4m_p81R</b> | tagtcccttaacccccgaat     | NM_178193.2 403 - 384       | QRT-PCR                        | 110 (with Hist1h4b_p81F)                                    |
| <b>Ppargc1a_p29F</b> | tgaaagggccaaacagagag     | NM_008904.2 2113 - 2132     | QRT-PCR                        |                                                             |
| <b>Ppargc1a_p29R</b> | gtaaatcacacggcgctctt     | NM_008904.2 2176 - 2157     | QRT-PCR                        | 64 (with Ppargc1a_p29F)                                     |
| <b>Hyal1_p29F</b>    | ttccagagacccccatgt       | NM_008317.4 975 - 993       | QRT-PCR                        |                                                             |
| <b>Hyal1_p29R</b>    | agggtgtgtccagttctt       | NM_008317.4 1071 - 1053     | QRT-PCR                        | 97 (with Hyal1_p29F)                                        |
| <b>SLC4A4_P68F</b>   | tcatggaccaacaattacagc    | NM_001098484.2 2504 - 2525  | QRT-PCR                        |                                                             |
| <b>SLC4A4_P68R</b>   | cacccaaaagagatccaagtg    | NM_001098484.2 2595 - 2575  | QRT-PCR                        | 92 (with SLC4A4_P68F)                                       |
| <b>FANCB_P29F</b>    | tggagaaggaactagtcaccctta | NM_001018113.2 2563 - 2586  | QRT-PCR                        |                                                             |
| <b>FANCB_P29R</b>    | tgctcactcacacctctgc      | NM_001018113.2 2649 - 2630  | QRT-PCR                        | 87 (with FANCB_P29F)                                        |
| <b>HIST1H4B_P9F</b>  | aagtgtgcgggataaacatc     | NM_003544.2 62 - 81         | QRT-PCR                        |                                                             |
| <b>HIST1H4B_P9R</b>  | ttaaccccaccacgccta       | NM_003544.2 134 - 117       | QRT-PCR                        | 73 (with HIST1H4B_P9F)                                      |
| <b>PPARGC1A_P6F</b>  | cgcagtcacaacacttacaagc   | NM_001330751.1 1371 - 1392  | QRT-PCR                        |                                                             |
| <b>PPARGC1A_P6R</b>  | ggggcatttggtgactctg      | NM_001330751.1 1444 - 1425  | QRT-PCR                        | 74 (with PPARGC1A_P6F)                                      |
| <b>HYAL1_P5F</b>     | ggaagtcacagatgtatgtgcaa  | NM_033159.3 927 - 949       | QRT-PCR                        |                                                             |
| <b>HYAL1_P5R</b>     | gattggggtcaccagcag       | NM_033159.3 1001 - 984      | QRT-PCR                        | 75 (with HYAL1_P5F)                                         |
| <b>UBTF_Q48F</b>     | caaaaccaccaatcacaca      | NM_014233.3 434 - 453       | QRT-PCR                        |                                                             |
| <b>UBTF_Q48R</b>     | tgtcaatgtacggaactcctc    | NM_014233.3 554 - 533       | QRT-PCR                        | 121 for both <i>UBTF1</i> and <i>UBTF2</i> (with UBTF_Q48F) |
| <b>UBTF_Q38F</b>     | ctcaaagtgcggccagat       | NM_014233.3 939 - 956       | QRT-PCR                        |                                                             |

|                  |                         |             |             |         |                                      |
|------------------|-------------------------|-------------|-------------|---------|--------------------------------------|
| <b>UBTF_Q38R</b> | tcttttgtccgagagctgag    | NM_014233.3 | 1020 - 1000 | QRT-PCR | 82 for <i>UBTF1</i> (with UBTF_Q38R) |
| <b>H45S_F</b>    | gccttcttagcgatctgagag   | NR_145819.1 | 1417 - 1438 | QRT-PCR |                                      |
| <b>H45S_R</b>    | ccataacggaggcagagaca    | NR_145819.1 | 1498 - 1479 | QRT-PCR | 82 (with H45S_F)                     |
| <b>ACTB_F</b>    | atgggtcagaaggattcctatgt | NM_001101.3 | 223 - 245   | QRT-PCR |                                      |
| <b>ACTB_R</b>    | ggatcatctctcgcggt       | NM_001101.3 | 444 - 427   | QRT-PCR | 222 (with ACTB_F)                    |
| <b>H18S_F</b>    | ttcgaacgtctgccctatcaa   | NR_003286.2 | 344 - 364   | QRT-PCR |                                      |
| <b>H18S_R</b>    | atggtaggcacggcgacta     | NR_003286.2 | 393 - 375   | QRT-PCR | 50 (with H18S_F)                     |



TGen\_UBTF\_Trio

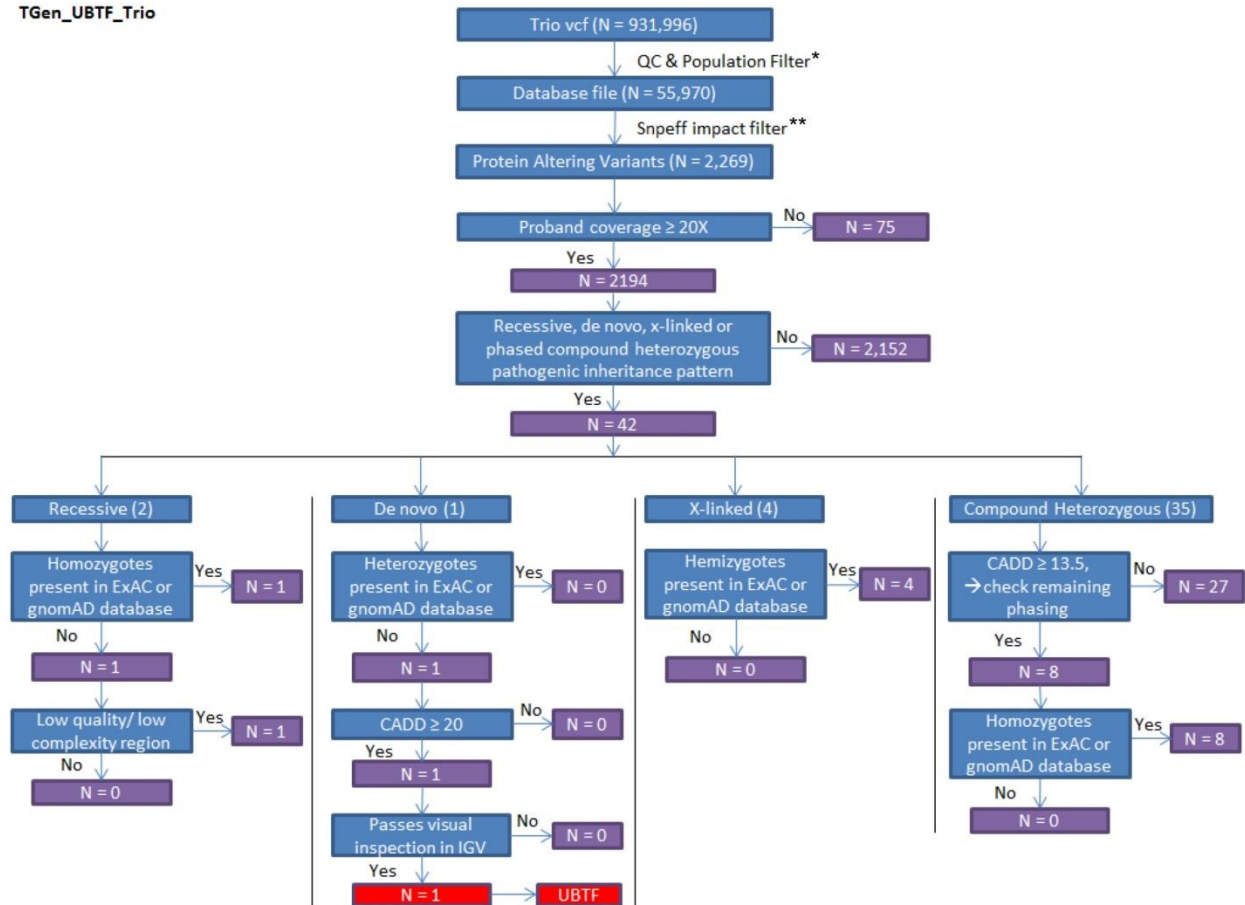

**Figure S1.** Translational genomics (TGen) exome analysis workflow. \*GATK QualScore  $\geq 300$  and 1000 Genomes frequency  $\leq 0.05$ . \*\*Snpeff Variant Impact = "HIGH" + "MODERATE" and gene  $\neq$  to "none" or "unknown."

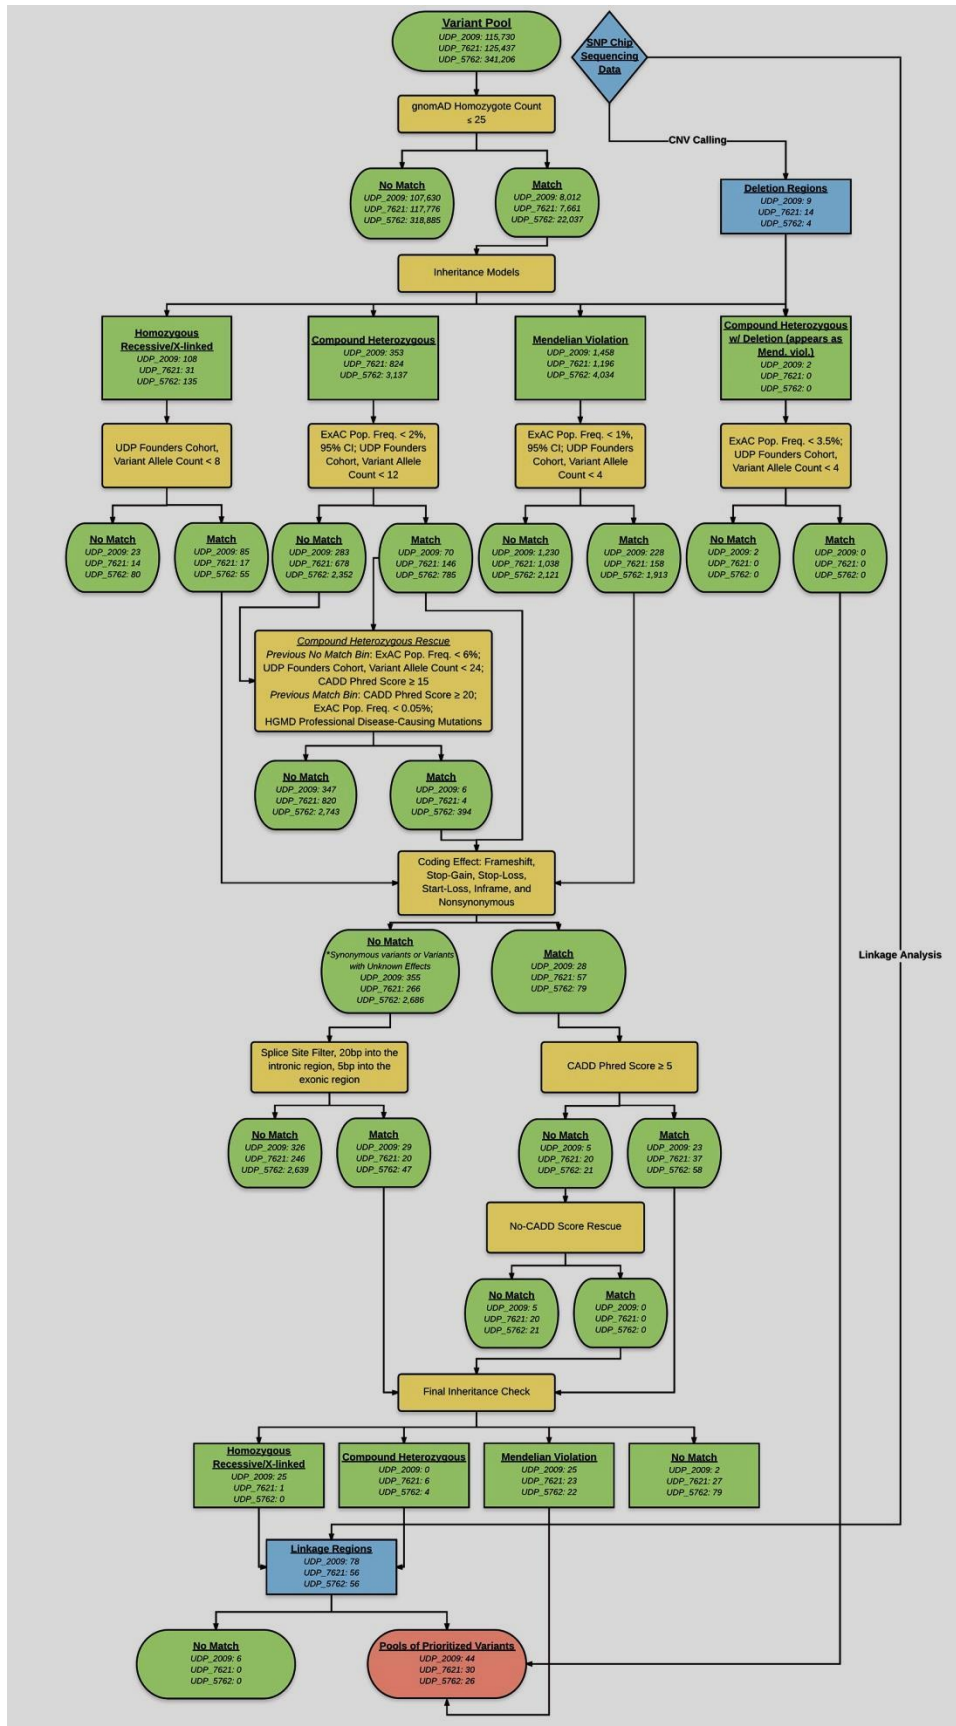

**Figure S2.** National Institutes of Health (NIH)/National Human Genome Research Institute (NHGRI)/Undiagnosed Disease Program (UDP) exome analysis workflow. The variant pools were processed with population frequency, inheritance models, and predicted deleteriousness filters. Variants that passed the filters were placed in the “Match” bins. SNP Chip sequencing data were utilized to call long regions (>150bp) with copy number variant of 0 or 1 and procure regions that were possibly disease-segregating through linkage analysis. In a gene, compound heterozygous candidates were considered if there was at least one maternally inherited variant and one paternally inherited variant. Weaker compound heterozygous candidates (ExAC Population Frequency < 6%, UDP Founders Cohort, Variant Allele Count < 24) were rescued with extremely strong compound heterozygous candidates (CADD Phred Score  $\geq$  20, ExAC Population Frequency < 0.05%, HGMD Professional Disease-Causing Mutations). A CADD Phred Score  $\geq$  15 filter was applied to weaker compound heterozygous candidates to curtail the number of rescued variants. Variants that passed the gnomAD homozygote count  $\leq$  25 and the ExAC population frequency filters were inspected for coding effects (frameshift, stop-gain, stop-loss, inframe, and nonsynonymous variants) and for possible splice site effects (20 bp into the intronic region and 5 bp into the exonic region). Variants with coding effects were then filtered with a CADD Phred Score  $\geq$  5 threshold, a threshold used for at least benign variants. Variants that did not have a CADD Phred Score annotation were rescued. A final inheritance check was conducted to categorize variants in each inheritance model. Variants that did not pass the final inheritance check were placed in the “No Match” bin as either failed compound heterozygous candidates or inheritance-unresolved candidates. Compound heterozygous and homozygous recessive/X-linked variants found in the linkage regions, Mendelian violation variants, and compound heterozygous variants with deletion variants were gathered as pools of prioritized variants for visual inspection and literature verification. Variants that passed visual inspection and literature verification were considered for further validation (Table S2).

TGen\_0328

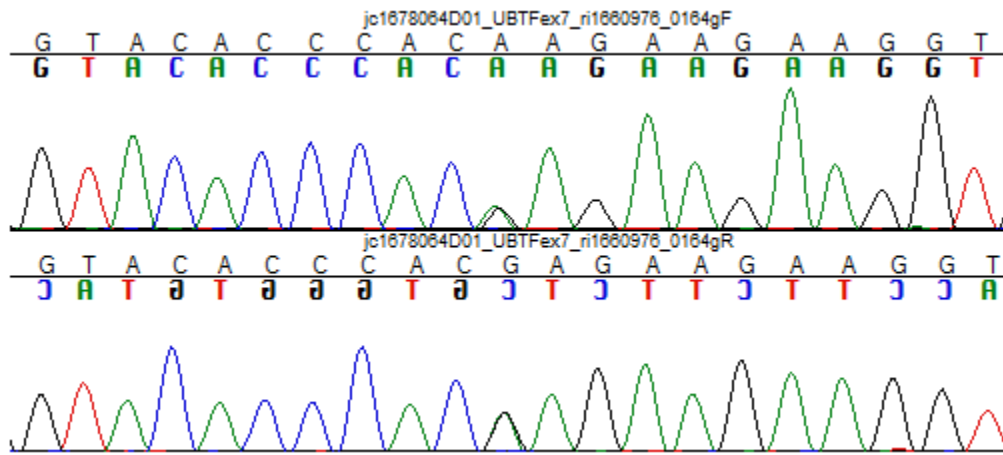

UDP\_2009

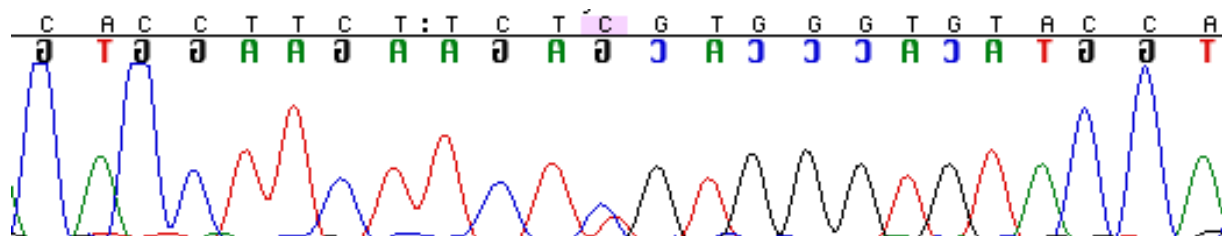

st40\_2433\_UBTF\_C-T\_R Fragment base #65. Base 65 of 144

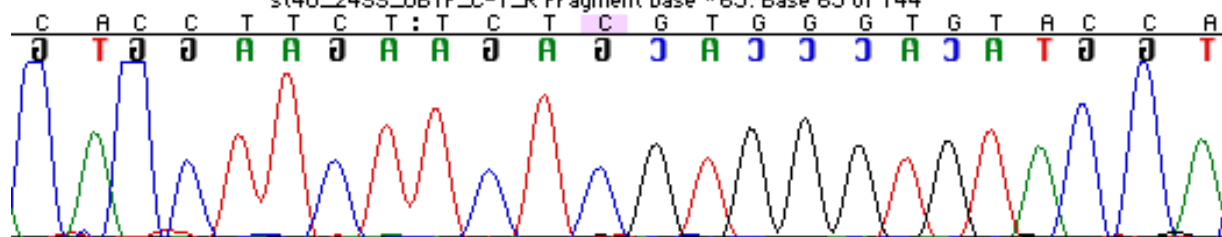

st36\_2625\_UBTF\_C-T\_R Fragment base #57. Base 57 of 137

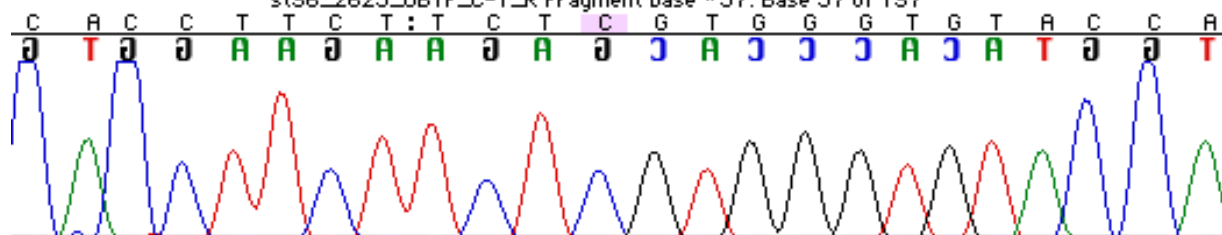

st34\_2626\_UBTF\_C-T\_R Fragment base #29. Base 29 of 114

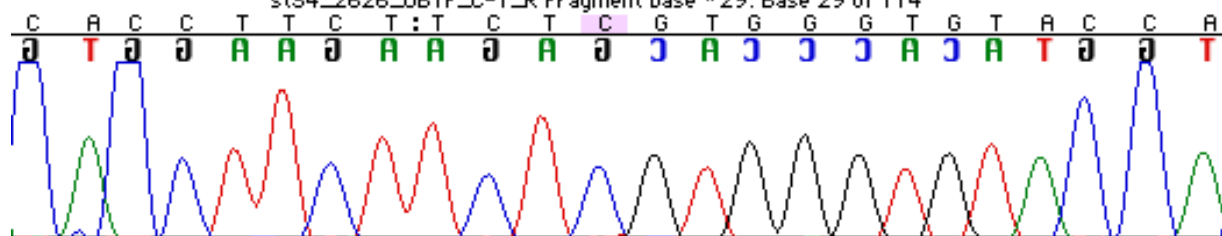

st38\_2434\_UBTF\_C-T\_R Fragment base #26. Base 26 of 105

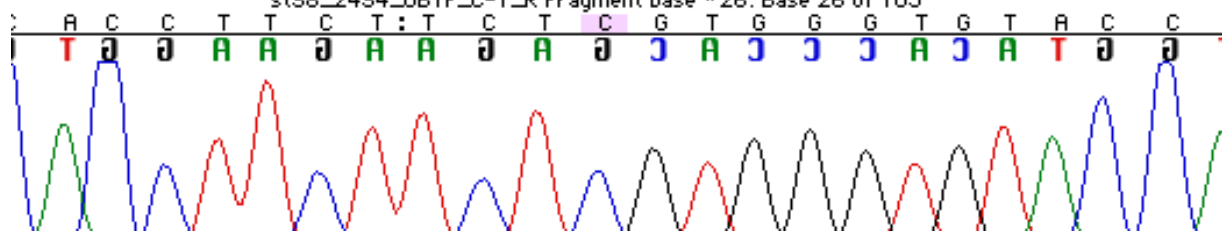

UDP\_7621

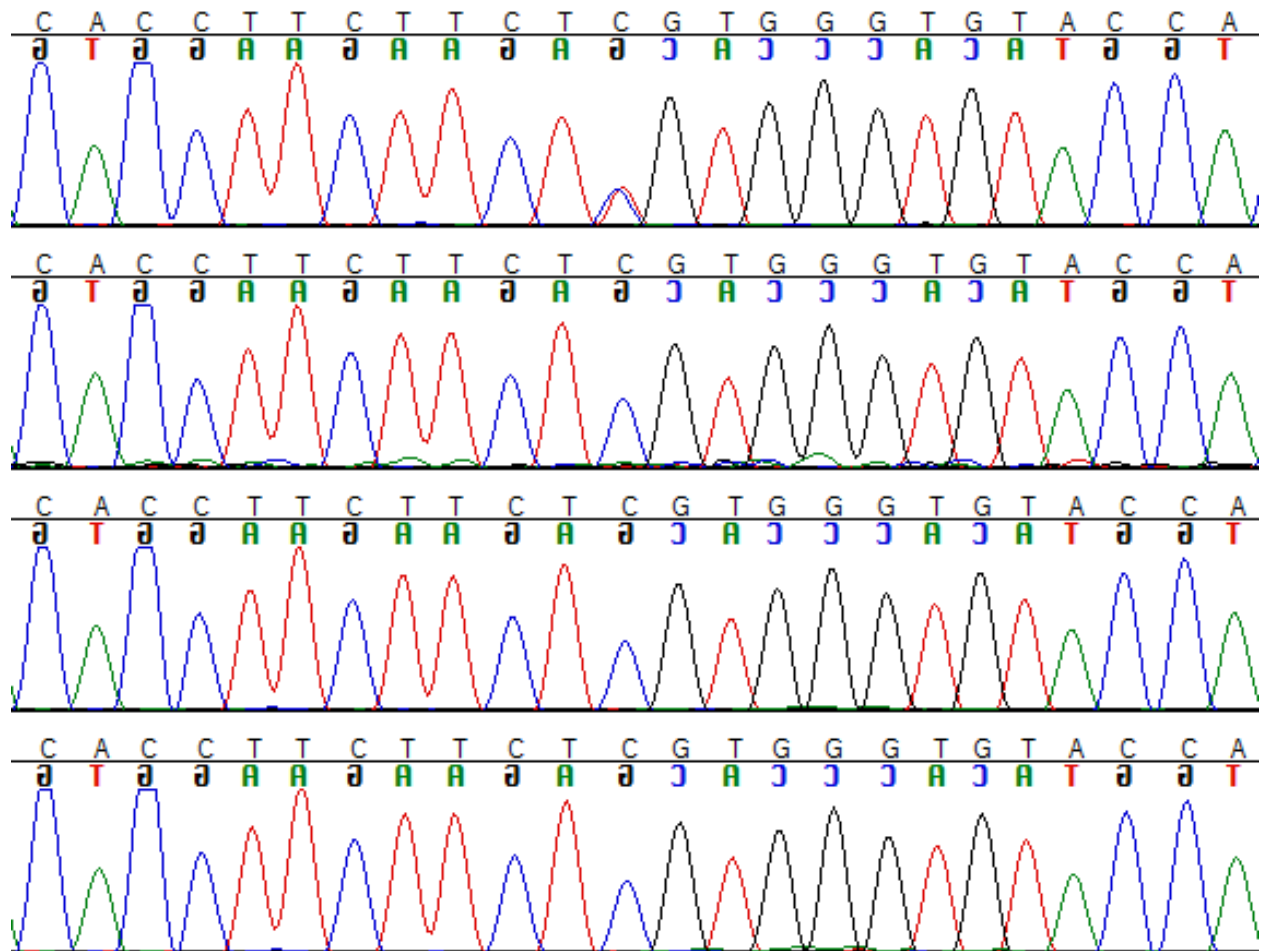

UDP\_5762

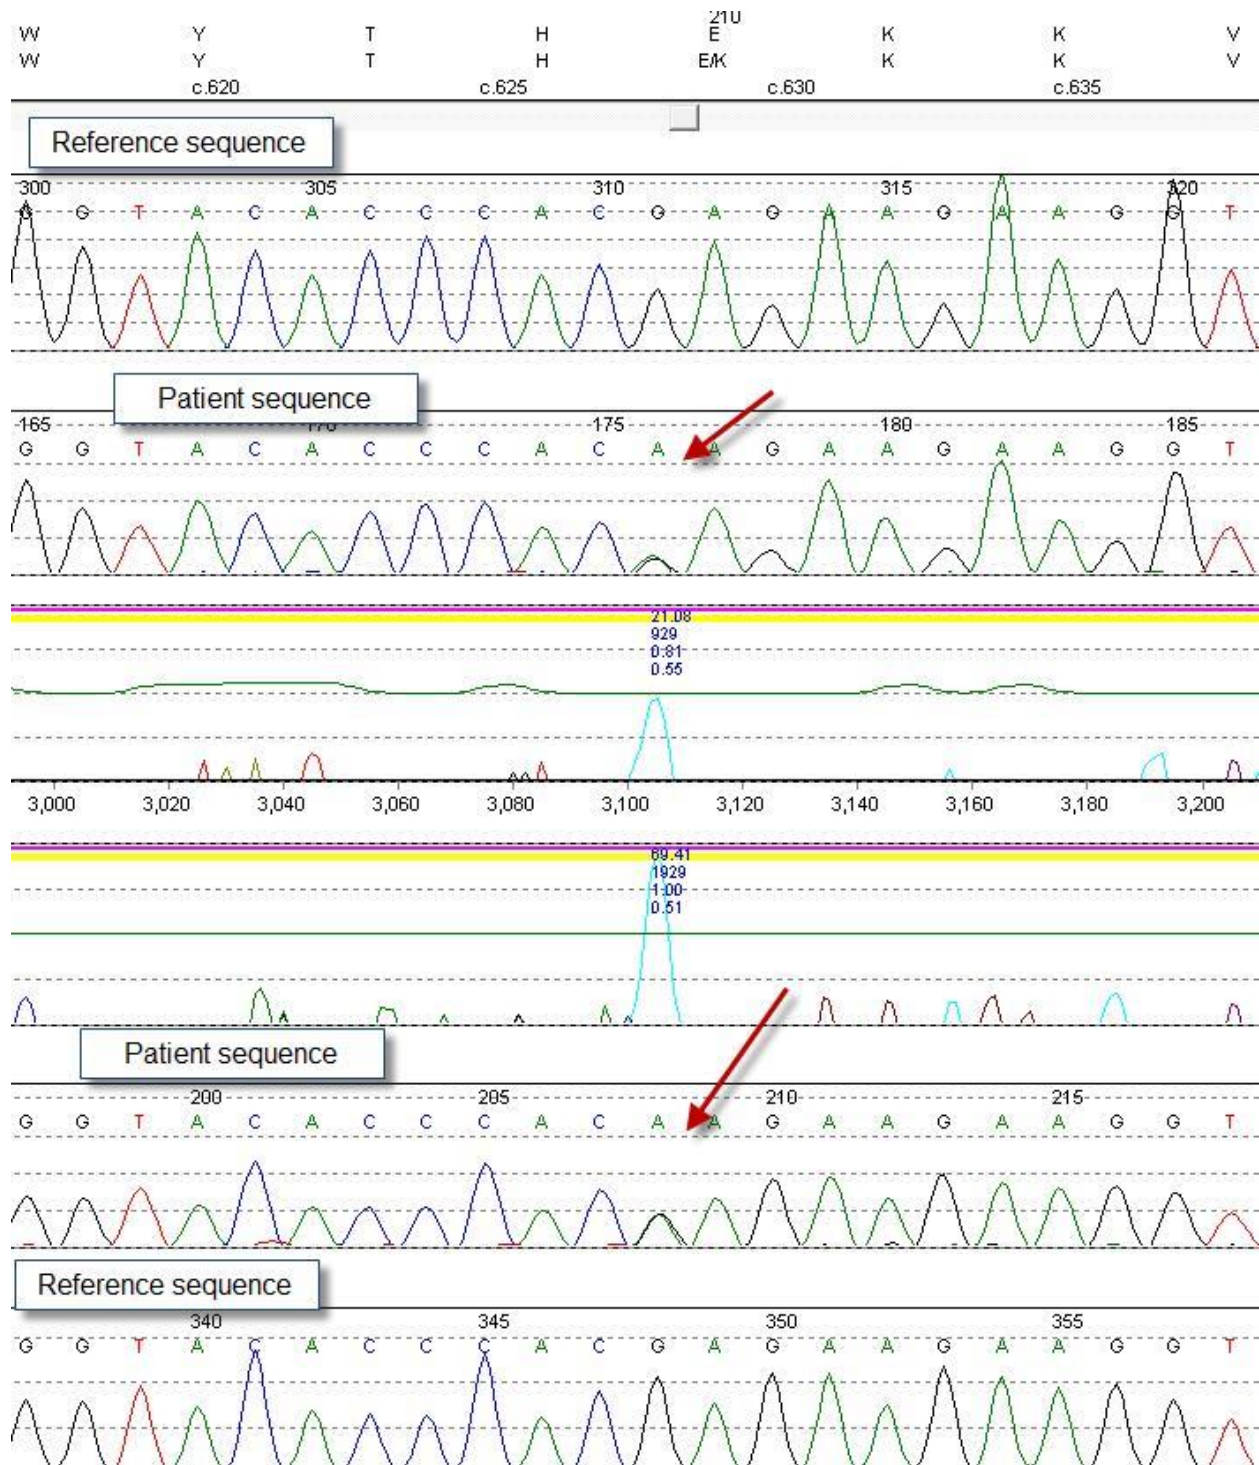

Figure S3. Confirmatory Sanger sequencing [NM\_014233.2:c.628G>A]



(A) UDP\_2009 T2 coronal at age 3.

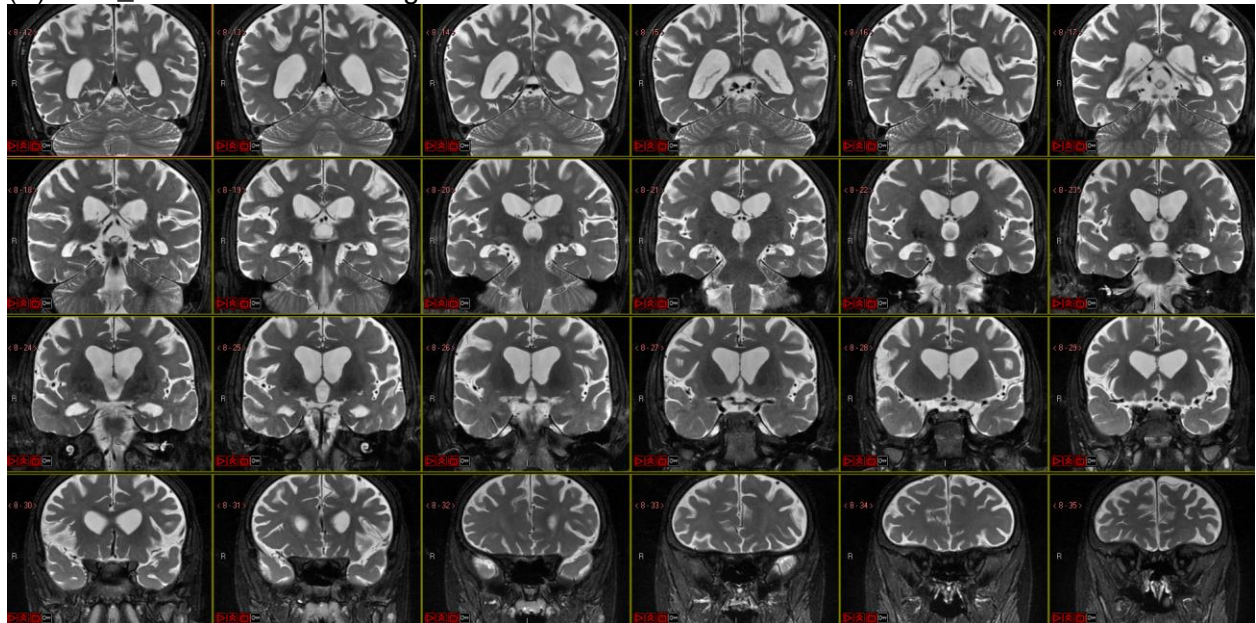

(B) UDP\_2009 T2 FLAIR at age 3.

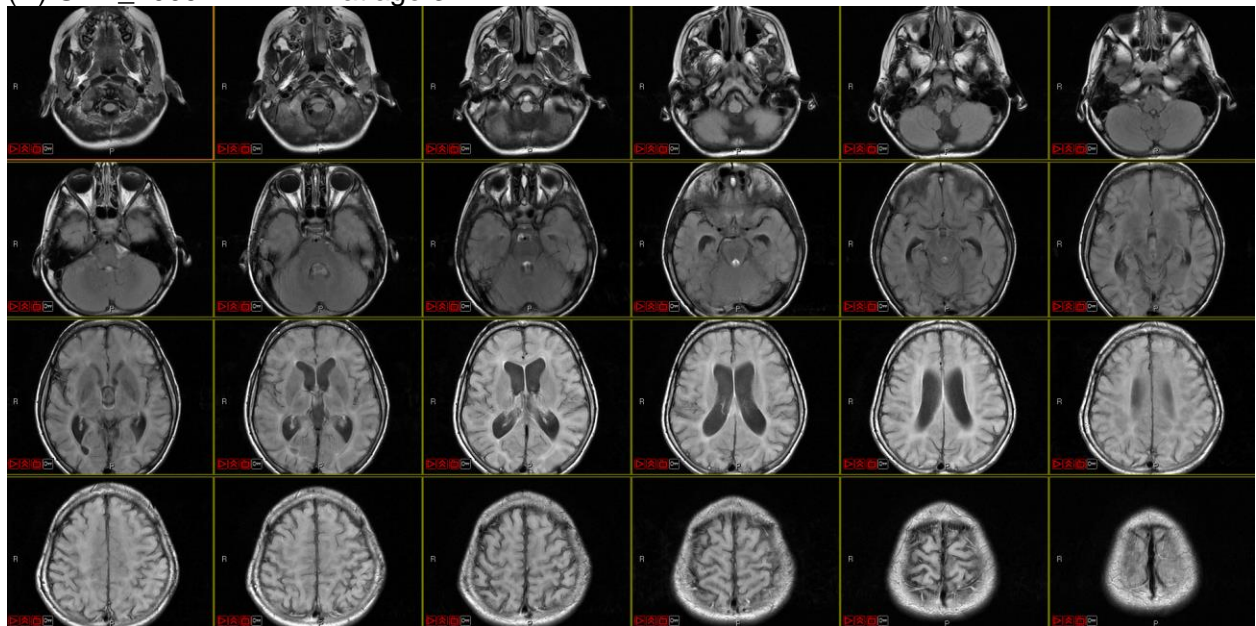



(C) UDP\_7621 T2 FLAIR at age 33

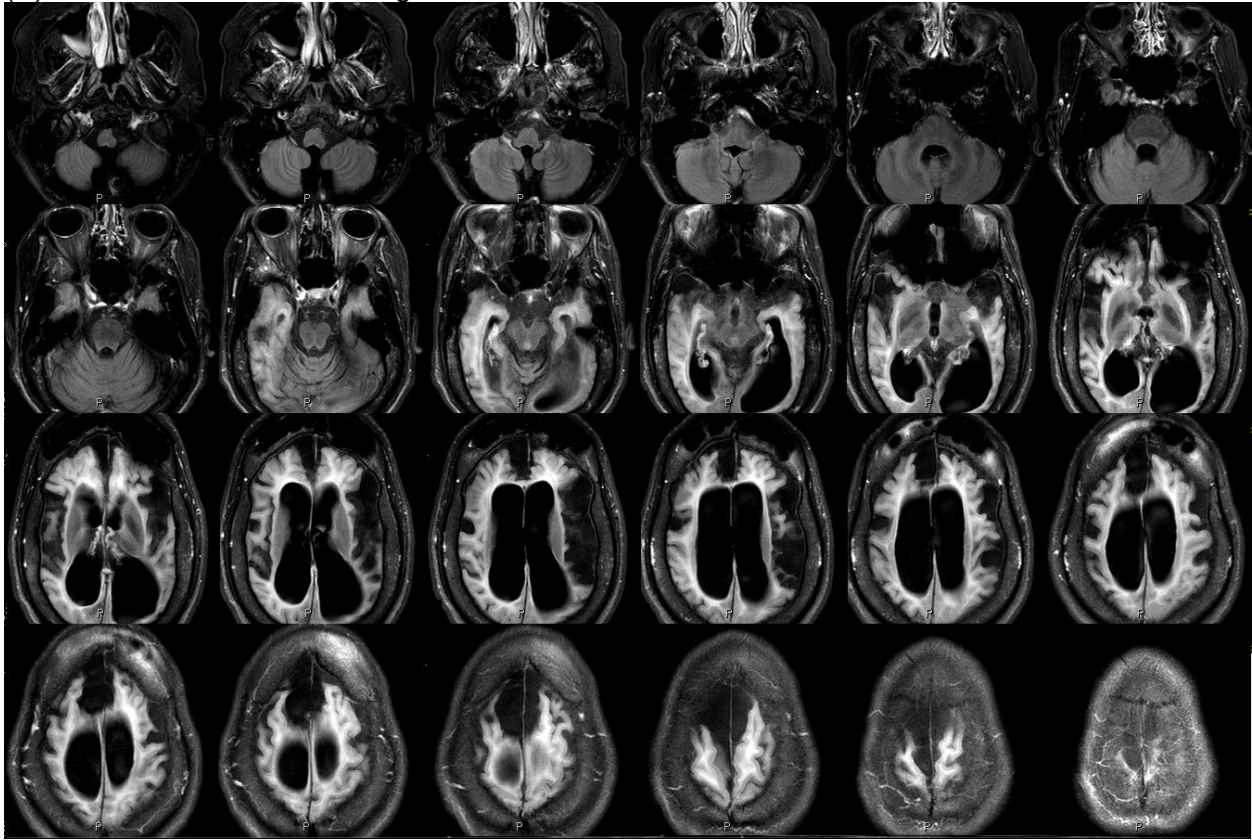

**Figure S4.** MRI images from UDP\_2009 (A and B) and UDP\_7621 (C).

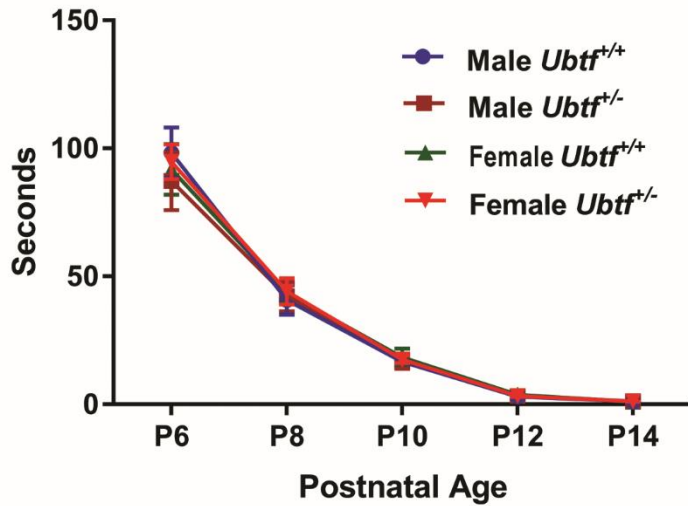

**Figure S5.** Righting reflex assays were performed prior to weaning in *Ubtf*<sup>+/+</sup> (N = 6 male and 5 female) and *Ubtf*<sup>+/-</sup> (N = 4 male and 5 female) mice.

### Supplementary References

- Li, H., Handsaker, B., Wysoker, A., Fennell, T., Ruan, J., Homer, N., Marth, G., Abecasis, G., Durbin, R. and 1000 Genome Project Data Processing Subgroup. (2009) The Sequence Alignment/Map format and SAMtools. *Bioinformatics*, **25**, 2078-2079.
- Quinlan, A.R. and Hall, I. M. (2010) BEDTools: a flexible suite of utilities for comparing genomic features. *Bioinformatics*, **26**, 841-842.
- Tarasov, A., Vilella, A.J., Cuppen, E., Nijman, I.J. and Prins, P. (2015) Sambamba: fast processing of NGS alignment formats. *Bioinformatics*, **31**, 2032-2034.
